# Supplementary material
Source: PubMed Central journal article supplement (PMC8852337)
Supplement: NIHMS1765642-supplement-10.pdf [file NIHMS1765642-supplement-10.pdf]

**Supplemental Table 1 (Related to STAR Methods).** Additional oligonucleotides used in the study.

| Oligonucleotides                                                                                                                                                                                                             |                                         |     |
|------------------------------------------------------------------------------------------------------------------------------------------------------------------------------------------------------------------------------|-----------------------------------------|-----|
| Primers for B6.Cg-Gt(ROSA)26Sortm40.1(CAG-aop3/EGFP)Hze/J. Wild type Forward: AAGGGAGCTGCAGTGGAGTA. Common: CCGAAAATCTGT GGGAAGTC. Mutant Forward: ATTGCATCGCATTGTCTGAG                                                      | Millipore Sigma/The Jackson Laboratory  | N/A |
| Primers for B6;129S6-Gt(ROSA)26Sortm9(CAG-mCherry,-CHRM4*)Dym/J. Wild type Forward: AAGGGAGCTGCAGTGGAGTA. Wild type Reverse: CAG GACAACGCCACACA. Mutant Forward: AGTAAGCTTGGGCTGCAGGT. Mutant Reverse: CATTGACAGGTGTGAAGTTGG | Millipore Sigma/The Jackson Laboratory  | N/A |
| Primers for FVB/N-Tg(Cdx2-flpo)2Ddg/J. NSE Sequence: TAGCCAGACTCCTGCCTGAT. FlpO sequence: GTTCACGATGTCGAAGCTCA                                                                                                               | The Jackson Laboratory/David Ginty      | N/A |
| Primers for Chx10-CRE. Forward Primer: GCATTAGACACCGGAGGG. creOutgen: CATCGACCGGTAATGCAGGC                                                                                                                                   | Thomas Jessell Lab (Crone et al., 2008) | N/A |
